# Supplementary material
Source: PubMed Central journal article supplement (PMC1450183)
Supplement: pnas_0511270103_3.pdf [file pnas_0511270103_3.pdf]

Table 1. Area of peaks shown in Fig. 6

| Peak # | Control             |          | <i>Bmpgdesat1</i>   |          | Student's <i>t</i> test* |
|--------|---------------------|----------|---------------------|----------|--------------------------|
|        | Avg. peak area, mAu | SD       | Avg. peak area, mAu | SD       |                          |
| 3      | 589,070             | ±28,729  | 345,391             | ±23,946  | **†                      |
| 3A     | 1,847,129           | ±200,275 | 1,819,341           | ±128,455 | NS                       |
| 4      | 2,084,494           | ±178,276 | 1,488,025           | ±172,911 | **†                      |
| 4A     | 1,127,990           | ±156,632 | 2,168,454           | ±146,931 | ***‡                     |
| 5      | 2,549,311           | ±131,007 | 2,452,237           | ±106,410 | NS                       |
| 5A     | 521,466             | ±21,179  | 513,461             | ±20,146  | NS                       |

NS, not significant.

\* Statistical analysis of avg. peak area control samples vs. *Bmpgdesat1* samples performed using Student's *t* test.

† *P* value < 0.001.

‡ *P* value < 0.0001.
