# Supplementary material
Source: PubMed Central journal article supplement (PMC1450183)
Supplement: pnas_0511270103_4.pdf [file pnas_0511270103_4.pdf]

Table 2. Primer sets used to produce T7 RNA polymerase templates

| Gene                      | F/R <sup>†</sup> | Primer sequence <sup>‡</sup>                                 | Size, nt |
|---------------------------|------------------|--------------------------------------------------------------|----------|
| <i>pgACBP</i>             | F                | <u>CCGGATCCTAATACGACTCACTATAGGGCGATGTCTCTCCAAGAAAAAT</u>     | 324      |
|                           | R                | <u>CCGGATCCTAATACGACTCACTATAGGGCGATGGAAGCTATGAGACCTC</u>     |          |
| <i>mgACBP</i>             | F                | <u>CCGGATCCTAATACGACTCACTATAGGGCGATGTCTCTCGACGAGCAAT</u>     | 297      |
|                           | R                | <u>CCGGATCCTAATACGACTCACTATAGGGCGGCGTATTTGGAGTGGAGTTT</u>    |          |
| <i>pgFAR</i>              | F                | <u>CCGGATCCTAATACGACTCACTATAGGGCGGGCACGAGGCGACGAAAC</u>      | 1,960    |
|                           | R                | <u>CCGGATCCTAATACGACTCACTATAGGGCGGGTAACTATAGAAATGGTTTAAC</u> |          |
| <i>Bmpgdesat1</i>         | F                | <u>CCGGATCCTAATACGACTCACTATAGGGCGGATGCCTCCTAATTCAGTG</u>     | 990      |
|                           | R                | <u>CCGGATCCTAATACGACTCACTATAGGGCGGATTCATTCCATTGGTCG</u>      |          |
| <i>PBANR</i> <sup>*</sup> | F                | <u>TAATACGACTCACTATAGGGAGATAGTGACTATTACGGCATT</u>            | 417      |
|                           | R                | <u>TAATACGACTCACTATAGGGAGATGACCCTCCTCTGTGAGC</u>             |          |
| <i>EGFP</i> <sup>*</sup>  | F                | <u>TAATACGACTCACTATAGGGAGAATGGTGAGCAAGGGCG</u>               | 717      |
|                           | R                | <u>TAATACGACTCACTATAGGGAGACTTGTACAGCTCGTCC</u>               |          |

<sup>‡</sup> Nucleotide sequences corresponding to the T7 promoter region are underlined.

<sup>\*</sup> Modified T7 promoter sequences used for PCR amplification.

<sup>†</sup> F indicates forward primer; R indicates reverse primer.
