# Supplementary material
Source: PubMed Central journal article supplement (PMC1450183)

**Knockdown % of bombykol**

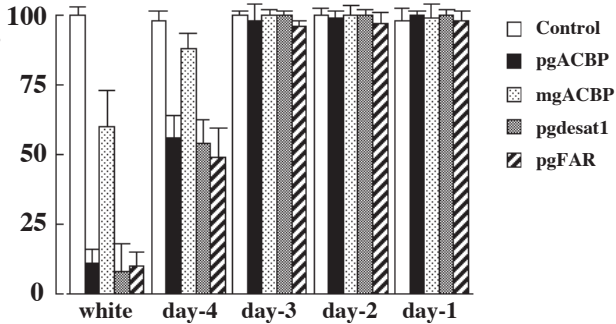

Supplement: pnas_0511270103_1.pdf [file pnas_0511270103_1.pdf]

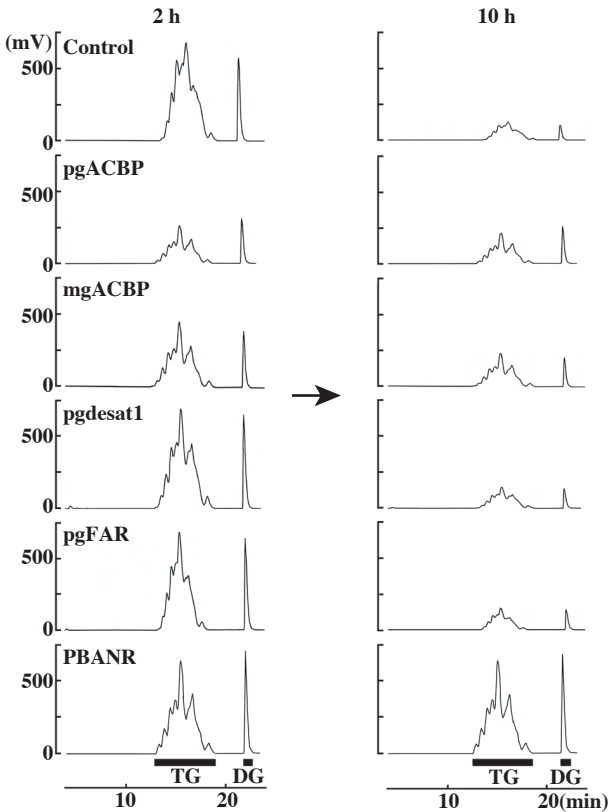

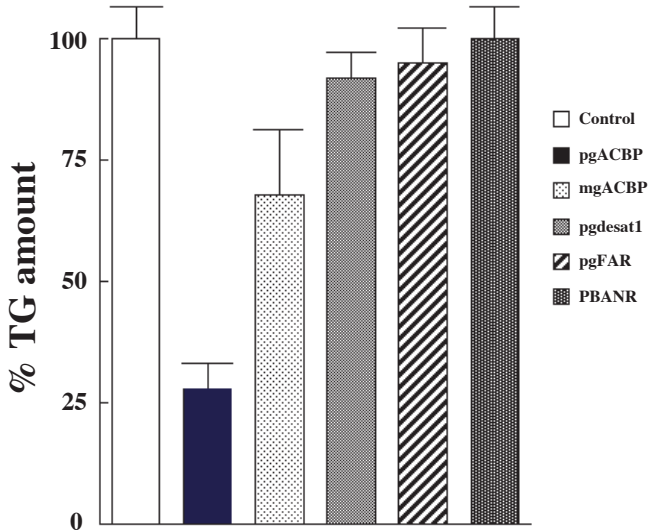

Supplement: pnas_0511270103_2.pdf [file pnas_0511270103_2.pdf]
